# Supplementary material for: Short stature and SHOX (Short stature homeobox) variants—efficacy of screening using various strategies
Source: PeerJ. 2020 Nov 17;8:e10236. doi: 10.7717/peerj.10236 (PMC7678493; doi:10.7717/peerj.10236)
Supplement: Table S1 — *cut off for blood F (X0) - 7.43 %, F(XXX)-2.0 % ; M (X0) - 7.5 %, M(XXY) - 4.9 %;buccal smear F(X0)- 9,0 % , F(XXX) - 4.5 %;M(X0)- 3.5 %, M(XXY)-5.9% (ISS- idiopathic short stature;MD-Madelung deformity;NA not analysed) [file peerj-08-10236-s001.xlsx]

## Sheet: List1
	gender	IN	karyotyping	microarray	blood-FISH (X0%)*	buccal smear-FISH (X0%)*	MLPA	segregation with short stature/origin	sequencing	interpretation	classification	age (month)	Z score	syndrome/phenotype	weight (per.)	MD	skeletal markers	facial dysmorphia	congenital malformation	neurodevelopmental disorders	micro-/macrocephaly	IUGR/ SGA	family history of SS	other	bone age delayed
1	F	2033/17	46,X,i(X)(q10)	NA	2.9	0	SHOXx1	de novo	NA	deletion SHOX resulting from CHA	pathogenic	70	-2.4	sex chromosome aberration (TS)	<3	no	disproportionate growth, mesomelia lower limbs, short IV. mtc.	yes	heart(septal defect)	slightly delayed motoric development	no	no	no	no	no
2	F	001/19	45,X[5]/46.X,i(X)(q10)[36]	NA	NA	29.7	SHOXx1	de novo	NA	deletion SHOX resulting from CHA	pathogenic	84	-3.3	sex chromosome aberration (TS)	<3	no	mesomelia, brachydactyly	no	renal	no	no	yes	no	lymhedema, broad neck	NA
3	F	396/16	45,X[48]/46,X,i(X)(q10)[4]	NA	89.2	92.6	SHOXx1	de novo	NA	deletion SHOX resulting from CHA	pathogenic	83	-2.08	sex chromosome aberration (TS)	>90	yes	no	yes	no	no	no	no	no	lymhedema, pterygium colli ,	no
4	M	1437/14	46,XY	NA	NA	NA	SHOXx1mat	no/inherited	NA	large deletion SHOX	pathogenic	78	-2.63	LWD	50	no	disproportionate growth, mesomelia, clinodactyly , muscular hyperthrophy	no	no	no	no	no	yes (mother LWD )	no	yes
5	F	1438/14 (mother of 1437/14)	NA	NA	NA	NA	SHOXx1	NA	NA	large deletion SHOX	pathogenic	444	-1.63	control		yes	diproportionate growth	mother 1437/14
6	F	1128/11	46,XX;.ish der(13)t(X;13)	NA	NA	NA	SHOXx1mat	no;balanced translocation in mother	NA	large deletion SHOX resulting from inherited translocation	pathogenic	228	-2.9	LWD	50	yes	proportionate growth,mesomelia of upper limbs, bowing of tibia,	abnormality of ears	no	no	no	no	no	genum varum	no
7	F	165/19	46,XX	.arrXp22.33(296520-1342026)x1	NA	NA	SHOX x1mat	yes/inherited	negative	large deletion SHOX	pathogenic	111	-2.66	LWD	<3	yes	disproportionate growth, mesomelia	no	no	no	no	no	yes (mother signs of LWD)	no	yes
8	F	1828/13	46,XX	NA	NA	NA	SHOXx1dn	de novo	NA	large deletion SHOX	pathogenic	83	-3.38	LWD	<3	yes	mesomelia, disproportionate growth	no	no	no	no	no	no	no	no
9	M	MJ	45,X[25]/46,XY[15]	NA	35.5	20	NA	de novo	NA	mosaic deletion resulting from X aneuploidy	pathogenic	38	-0.71	control	25	no	no	no	hypospadia, cryptorchidism	no	no	no	no	no	no
10	F	1091/15	45,X[4]/46,XX[54]	NA	12.9	35.3	NA	de novo	NA	mosaic deletion resulting from X aneuploidy	pathogenic	32	-0.91	control	20	no	no	no	no	no	no	yes	no	no	no
11	F	1424/15	45,X[9]/46,XX[26]	NA	43.9	30.2	SHOXx1~2	de novo	NA	mosaic deletion resulting from X aneuploidy	pathogenic	114	-2.17	sex chromosome aberration (TS)	3	yes	proportionate, short IV. and V. mtc.	no	no	no	no	yes	no	pterygium colli, high-arched palate,m. Crohn	no
12	F	79/19	46,XX[80]	NA	0	12.3	SHOXx2	de novo	NA	mosaic deletion resulting from X aneuploidy	pathogenic	141	-3.31	sex chromosome aberration (TS)	<3	no	no	no	no	no	no	no	no	no	no
13	M	1759/14	45,X[12]/46,XYqh-[39];.ish idic(Y)(q?11.22)(SHOXx3)	NA	20.6	0	SHOXx2;PAR2x1	de novo	NA	mosaic deletion/duplication resulting from structural rearrangement and X aneuploidy	pathogenic	204	-1.24	control	>90	no	no	no	no	no	no	no	no	infertility	no
14	M	1758/18	46,XY(1. analysis); 45,X[3]/46,X,idic(Y)(q?11.2)[35] (2. analysis)	arrXYp22.3(167699_2699968)x3, XYq28(154939085_155234707)x1,Yp11.32q11.223(2654333_24007623)x2, Yq11.223q12(24357567_58906722)x0	11.5	21.8	SHOXx3;PAR2x1	de novo	negative	mosaic deletion/duplication resulting from structural rearrangement and X aneuploidy	pathogenic	118	-3.52	sex chromosome aberration	<3	no	no	no	no	no	no	yes	no	no	no
15	M	83/14	46,Xdel(Y)(q?11.2)	arrYp11.32(10701_700807)x3,Yp11.2(6000669_7430343)x4,Yq11.21q11.223(14543044_26066972)x0	4.5	6	SHOXx3;PAR2x1	de novo	negative	mosaic deletion/duplication resulting from structural rearrangement and X aneuploidy	pathogenic	147	-3.00	sex chromosome aberration	89	no	no	no	no	no	no	yes	no	no	yes
16	F	1255/15	45,X	NA	100	91 % (X0) and 9 % (XXX)	SHOXx1	de novo	NA	mosaic deletion/duplication resulting from X aneuploidy	pathogenic	167	-5.06	sex chromosome aberration (TS)	25	no	proportionate growth, mesomelia of upper limbs,short IV. mtc	no	no	no	no	no	no	broad neck, hypogonadism	no
17	M	1841/16	46,XY	NA	NA	NA	SHOX-CNE(SHOX)x1pat	no/inherited pat	negative	deletion of regulatory elements	VUS	54	-0.98	control	25	no	no	no	no	no	no	no	yes	no	yes
18	M	1106/15 (brother 1841/16)	46,XY	NA	NA	NA	SHOX-CNE(SHOX)x1pat	no/inherited pat	negative	deletion of regulatory elements	VUS	67	-1.53	control	25	no	no	no	no	no	no	no	yes	no	yes
19	M	1239/15	46,XY	NA	NA	NA	SHOX-CNE(SHOX)x1	no	negative	deletion of regulatory elements	VUS	480	-1.47	control	father 1841/16 and 1106/15
20	F	145/19	46,XX	NA	NA	NA	SHOX-CNE(SHOX)x1	NA	NA	deletion of regulatory elements	pathogenic	200	-3.81	LWD	25	no	disproportionate growth, mesomelia	no	no	no	no	no	yes	genum varum	no
21	M	362/11	46,XY;.ish der(X)t(X;13)mat	NA	NA	NA	SHOXx3mat	no;balanced translocation in mother	NA	large duplication SHOX resulting from inherited translocation	VUS	222	1.53	control	>90	no	disproportionate large growth	yes(micromandible)	renal	yes	yes	no	no	delayed maturity,high-arched palate	NA
22	F	95/13	46,XX	arr Xp22.33(422642-613567)x3pat	NA	NA	SHOXx3pat	no/inherited pat	NA	duplication SHOX	VUS	175	-1.93	control	>90	no	no	yes	yes (Dandy-Wolker m.)	yes	no	yes	no	genua valga,high-arched palate	no
23	M	1077/13	NA	arr Xp22.33(422642-613567)x3	NA	NA	SHOXx3	no	NA	duplication SHOX	VUS	588	-1.47	control	father 95/13
24	F	700/15	46,XX	NA	NA	5.8	SHOXx3mat	no/inherited mat	negative	duplication SHOX	VUS	36	-2.5	non specific	26	no	no	yes	no	psychomotoric delay	no	prematurity	no	no	yes
25	F	577/15	46,XX	NA	NA	NA	SHOX-CNE/down(SHOX)x3	no	NA	duplication of regulatory elements	VUS	60	-0.22	control	>90	no	no	no	no	yes (autism)	no	no	no	no	NA
26	M	987/17	46,XY	NA	NA	NA	SHOX-CNE/down(SHOX)x3	NA	NA	duplication of regulatory elements	VUS	200	-0.95	control	90	no	disproportionate large growth	no	no	no	no	no	no	delayed maturity,	NA
27	F	1608/18	46,XX	NA	NA	0	SHOX-CNE/down(SHOX)x3pat	no/inherited pat	negative	duplication of regulatory elements	VUS	62	-2.9	non specific	10	no	disproportionate growth restriction	abnormality of ears	no	no	no	no	no	no	no
28	M	1911/18	NA	NA	NA	NA	SHOX-CNE/down(SHOX)x3	NA	NA	duplication of regulatory elements	VUS		0.67	control	father 1608/18
29	F	2372/18	46,XX	NA	NA	7.2	SHOX-CNE/down(SHOX)x3pat	no/inherited pat	negative	duplication of regulatory elements	VUS	79	-2.13	ISS	20	no	no	no	no	no	no	no	no	no	yes
30	M	1449/16	46,XY	NA	NA	NA	SHOX-CNE/down(SHOX)x3	NA	negative	duplication of regulatory elements	VUS	153	-2.3	ISS	10	no	no	no	no	no	no	no	no	psychosocial deprivation	yes
31	F	36/15 (sister 699/15)	46,XX	NA	5	5	SHOX-CNE/down(SHOX)x3mat	no/inherited mat	negative	duplication of regulatory elements	VUS	168	-2.37	ISS	<3	no	no	no	no	no	no	no	yes	no	yes
32	F	699/15	46,XX	NA	NA	NA	SHOX-CNE/down(SHOX)x3mat	no/inherited mat	negative	duplication of regulatory elements	VUS	68	-2.5	ISS	55	no	no	no	no	no	no	no	yes	no	no
33	F	218/16	NA	NA	NA	NA	SHOX-CNE/down(SHOX)x3	NA	NA	duplication of regulatory elements	VUS	480	-0.68	control	mother 699/15 and 36/15
34	M	790/15	46,XY	NA	NA	NA	SHOX-CNE/up(SHOX)x3mat	yes/inherited mat	negative	duplication of regulatory elements	VUS	107	-3.06	ISS	4	no	no	no	no	no	no	no	yes	cleft palate	no
35	F	1546/15	NA	NA	NA	NA	SHOX-CNE/up(SHOX)x3pat	yes/inherited pat	NA	duplication of regulatory elements	VUS	432	-2.27	ISS	mother 790/15
36	M	489/16	NA	NA	NA	NA	SHOX-CNE/up(SHOX)x3	NA	NA	duplication of regulatory elements	VUS	900	-2.90	ISS	father 1546/15
37	F	52/14	46,XX	NA	NA	NA	SHOX-CNE/down(SHOX)x3pat	yes/inherited pat	negative	duplication of regulatory elements	VUS	53	-2.94	non specific	<3	no	acromicria	no	no	delayed speech, ADHD	no	yes/prematurity	yes	no	no
38	M	849/14	NA	NA	NA	NA	SHOX-CNE/down(SHOX)x3	NA	NA	duplication of regulatory elements	VUS	408	-2.82	ISS	father 52/14
39	F	514/18	46,XX	NA	0	0	SHOXx2	no/inherited pat	NM_000451.3(SHOX):c.486+45G>A	point mutation	VUS	126	-2.53	ISS	30	no	no	no	no	no	no	no	no	no	yes
40	M	1259/18	NA	NA	NA	NA	NA	NA	NM_000451.3(SHOX):c.486+45G>A	point mutation	VUS	552	-0.33	control	father 1259/18
41	F	1610/16	46,XX	NA	5.2	NA	SHOXx2	yes/inherited pat	rs370327147 VUS pat	point mutation	VUS	168	-4.29	ISS	>90	no	variant of ulna,disproportionate growth, shorter femur and tibia	no	no	no	no	yes	yes	no	no
42	M	416/16	NA	NA	NA	NA	NA	NA	rs370327147 VUS	point mutation	VUS	600	-2.9	ISS			disproportionate growth	father 1610/16
	*cut off for blood F (X0) - 7.43 %, F(XXX)-2.0 % ; M (X0) - 7.5 %, M(XXY) - 4.9 %;buccal smear F(X0)- 9,0 % , F(XXX) - 4.5 %;M(X0)- 3.5 %, M(XXY)-5.9% (ISS- idiopathic short stature;MD-Madelung deformity;NA not analysed)
